# Supplementary material for: Networks of geometrically coherent faults accommodate Alpine tectonic inversion offshore southwestern Iberia
Source: Copernicus journal article supplement (doi:10.5194/se-15-39-2024), 2024-01-29
Supplement: Supplementary file 1 [file se-15-39-2024-supplement.zip]

Archive with 2 entries (2 files):
- Table S1 - Measurements of Iberia Compression - SW Iberia - final.xlsx
- se-15-39-2024-supplement-title-page.pdf
