# Supplementary material for: Networks of geometrically coherent faults accommodate Alpine tectonic inversion offshore southwestern Iberia
Source: Copernicus journal article supplement (doi:10.5194/se-15-39-2024), 2024-01-29
Supplement: Supplementary file 1 [file se-15-39-2024-supplement.zip › se-15-39-2024-supplement-title-page.pdf]

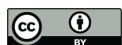

## *Supplement of*

# **Networks of geometrically coherent faults accommodate Alpine tectonic inversion offshore southwestern Iberia**

**Tiago M. Alves**

*Correspondence to:* Tiago M. Alves ([alvest@cardiff.ac.uk](mailto:alvest@cardiff.ac.uk))

- [se-15-39-2024-supplement-title-page.pdf](#)
- [Table S1 - Measurements of Iberia Compression - SW Iberia - final.xlsx](#)

The copyright of individual parts of the supplement might differ from the article licence.
