# Supplementary material for: Networks of geometrically coherent faults accommodate Alpine tectonic inversion offshore southwestern Iberia
Source: Copernicus journal article supplement (doi:10.5194/se-15-39-2024), 2024-01-29
Supplement: Supplementary file 1 [file se-15-39-2024-supplement.zip › Table S1 - Measurements of Iberia Compression - SW Iberia - final.xlsx]

## Sheet: Sheet1
	Measurement of tectonic uplift and horizontal advection - West Iberia
SW SECTOR
Fault number:		3				Measurement from southern tip
					Max Apparent Uplift (ms)		Horizontal Advection (m)
Perpendicular Line Number:
1			549		965		2667
2			547		202		1920
3			546		786		1849
4			545		393		2276
5			544		236		3334
6			543		190		2669
7			542		213		2700
8			541		109		2669
9			540		231		2099
10			539		213		1210
11			538		196		1351
12			537		364		2276
13			536		109		676
14			535		98		670
15			534		0		0		normal fault
16			532		271		1102
17			531		514		2419
18			530		1937		4089		seamount
19			529		2041		3985		seamount
20			528		2267		3271		seamount
21			527		1996		4446		seamount
22			526		2192		5511		slope fault system
23			525		1976		4517		slope fault system
24			524		1886		4100		slope fault system
25			523		1807		4726		slope fault system
26			522		1706		3470		slope fault system
27			521		1796		3544
28			520		1581		4796
29			519		2237		5210		major thrust fault
30			518		1378		4100		major thrust fault
31			517		937		5120		major thrust fault
32			516		678		2707		major thrust fault
33			515		440		1876		major thrust fault
34			514		1112		4612		Descobridores seamounts
35			513		1039		2501		Descobridores seamounts
36			512		894		2779		uplift of syn-rift basin
37			511		1012		2776		uplift of syn-rift basin
38			510		1590		2279		seamount
39			509		1066		3387		seamount
40			508		1509		3309
41			507		723		2332
42			506		0		0		normal fault
43			505		0		0		normal fault
44			503		0		0		normal fault
45			502		0		0
Fault number:		7				Measurement from southern tip
					Max Apparent Uplift (ms)		Horizontal Advection (m)
1	Perpendicular Line Number:		549		180		1377
2			548		291		1599
3			547		158		1289
4			546		1858		6580		Marques de Pombal Fault
5			545		1301		6928		Marques de Pombal Fault
6			544		1055		6847		Marques de Pombal Fault
7			543		1178		6491		Marques de Pombal Fault
8			542		1424		4180		Marques de Pombal Fault
9			541		1786		5603		Marques de Pombal Fault
10			540		1970		7921		Marques de Pombal Fault
11			539		2255		7988		Marques de Pombal Fault
12			538		2655		8756		Marques de Pombal Fault
13			537		2361		6182		poorly observed horizontal advection
14			536		712		4099
15			535		779		5556
16			534		429		2152
17			532		158		914		uplift of syn-rift basin
18			531		137		487		uplift of syn-rift basin
19			530		180		418		uplift of syn-rift basin
20			529		60		345
21			528		64		285
Fault number:		25				Measurement from southern tip
					Max Apparent Uplift (ms)		Horizontal Advection (m)
1	Perpendicular Line Number:		537		134		967		thrust anticline
2			536		208		996		thrust anticline
3			535		249		967
4			534		171		727
5			532		592		1965		major thrust
6			531		1198		4182		major thrust
7			530		2003		4922		major thrust and seamount
8			529		1702		4213		major thrust and seamount
9			528		1596		3130
10			527		1133		3671
11			526		583		2704		uplift of syn-rift basin
12			525		782		2048
13			524		856		3159		thrust anticline
14			523		379		2648
15			522		138		939
16			521		157		1141		thrust anticline
Fault number:		24				Measurement from southern tip
					Max Apparent Uplift (ms)		Horizontal Advection (m)
1	Perpendicular Line Number:		541		0		0
2			540		217		717
3			539		419		1379
4			538		677		2222
5			537		867		2890
6			536		767		3333
7			535		825		2612
8			534		740		2169
9			532		1012		4335
10			531		506		2279
11			530		990		4180
12			529		622		3470
13			528		990		4842
14			527		788		3558
15			526		1328		5059
16			525		1757		7279		seamount
17			524		1518		7557		seamount
18			523		1509		5226		seamount
19			522		1210		3780
20			521		1174		3336		Rincao do Lebre basin
21			520		1111		2946		Rincao do Lebre basin
22			519		804		2222		Rincao do Lebre basin
23			518		903		1507		Rincao do Lebre basin
24			517		695		1362
25			516		135		500		normal fault
Fault number:		23				Measurement from southern tip
					Max Apparent Uplift (ms)		Horizontal Advection (m)
1	Perpendicular Line Number:		541		600		2712
2			540		354		2357		uplift of syn-rift basin
3			539		375		3133		uplift of syn-rift basin
4			538		636		3834		uplift of syn-rift basin
5			537		432		1052		uplift of syn-rift basin
6			536		266		1067
7			535		751		2206
8			534		1381		1943		seamount
9			532		1771		2335		seamount
10			531		2270		4759		seamount
11			530		1410		3689		uplift of shelf margin with onlap of Cenozoic sediment
12			529
13			528		1506		3470		uplift of syn-rift basin
14			527		1351		3340		uplift of syn-rift basin
15			526		1178		3877
16			525		867		3066		uplift of syn-rift basin
17			524		383		2015		uplift of syn-rift basin
18			523		0		0		normal fault
19			522		0		0		normal fault (gravitational complex at Roncao do Lebre)
20			521		0		0		normal fault (gravitational complex at Roncao do Lebre)
21			520		0		0		normal fault (gravitational complex at Roncao do Lebre)
Fault number:		9				Measurement from southern tip
					Max Apparent Uplift (ms)		Horizontal Advection (m)
1	Perpendicular Line Number:		530		0		0
2			529		0		0
3			528		0		0		normal fault
4			527		759		3000
5			526		500		4502
6			525		501		3777
7			524		741		4720		uplift of syn-rift basin
8			523		885		3170		uplift of syn-rift basin
9			522		578		2945		uplift of syn-rift basin
10			521		840		5445		uplift of syn-rift basin
11			520		1139		4892
12			519		1184		5002
13			518		578		3890
14			517		967		4166
15			516		667		2556
16			515		730		4136
17			514		1126		5282		uplift of Upper Cenozoic strata
18			513		497		3333		uplift of Upper Cenozoic strata
19			512		487		2389		uplift of Upper Cenozoic strata
20			511		551		1611
21			510		261		1832
Fault number:		12				Measurement from southern tip
					Max Apparent Uplift (ms)		Horizontal Advection (m)
1	Perpendicular Line Number:		515		92		278
2			514		32		99
3			513		87		277
4			512		0		0		eroded scarp
5			511		132		400
6			510		116		290
7			509		54		179
8			508		106		349
9			507		78		352
10			506		78		406
11			505		0		0		eroded scarp
12			504
13			503		0		0		eroded scarp
14			502		670		3010
15			501		832		3979
Fault number:		13				Measurement from southern tip
					Max Apparent Uplift (ms)		Horizontal Advection (m)
1	Perpendicular Line Number:		508		148		412		horst
2			507		174		830		horst
3			506		281		931		seamount
4			505		114		380		horst
5			504
6			503		57		341		horst
7			502		66		403
8			501		33		181
Fault number:		26				Measurement from southern tip
					Max Apparent Uplift (ms)		Horizontal Advection (m)
1	Perpendicular Line Number:		515		0		0
2			514		96		364
3			513		52		341
4			512		81		50		normal fault
5			511		259		100		normal fault
6			510		333		179
7			509		270		1070		tilted horst
8			508		100		535		tilted horst
9			507		104		736
10			506		88		278
11			505		103		718
12			504
13			503		62		205
Fault number:		8				Measurement from southern tip
					Max Apparent Uplift (ms)		Horizontal Advection (m)
1	Perpendicular Line Number:		508		181		397
2			507		192		660
3			506		921		3399
4			505		614		1798
5			504		1066		4007		thrust on the S bank of the Setubal Canyon
6			503		995		4441		thrust on the S bank of the Setubal Canyon
7			502		955		2591		thrust on the S bank of the Setubal Canyon
Fault number:		11				Measurement from southern tip
					Max Apparent Uplift (ms)		Horizontal Advection (m)
1	Perpendicular Line Number:		542		292		0		normal fault
2			541		392		1251
3			540		233		1798
4			539
5			538
6			537
7			536
8			535		355		1944		uplift of syn-rift strata
9			534
10			532		332		1411		normal fault at the indentor - measured on a frontal thrust
11			531
12			530		354		3155		normal fault at the indentor - measured on a frontal thrust
13			529
14			528
15			527		260		2293		normal fault at the indentor - measured on a frontal thrust
16			526
17			525		622		3201
18			524
19			523		694		3260		Overlap with the Pereira de Souza Fault
20			522		730		3655		Overlap with the Pereira de Souza Fault
21			521		701		4134		Overlap with the Pereira de Souza Fault
22			520		974		5155		Flick in the dip of the Pereira de Souza Fault (now verging to the E)
23			519		882		2727		Flick in the dip of the Pereira de Souza Fault (now verging to the E)
24			518		932				normal fault
25			517		689				normal fault
26			516		346				normal fault
27			515		238				normal fault
28			514		209				normal fault
29			513		616				normal fault
30			512		194				normal fault
31			511		417				normal fault
32			510		853				normal fault
33			509		2219		2563		horst
34			508		1453		2755		thrust on the S bank of the Setubal Canyon
35			507		2096		5466		thrust on the S bank of the Setubal Canyon
36			506		1814		6359		thrust on the S bank of the Setubal Canyon
37			505		2190		4757		thrust on the S bank of the Setubal Canyon
38			503		947		2872
									thrust on the S bank of the Setubal Canyon
Fault number:		10				Measurement from southern tip
					Max Apparent Uplift (ms)		Horizontal Advection (m)
Perpendicular Line Number:			506		383		1778		thrust on the N bank of the Setubal Canyon
			505		867		5023		thrust on the N bank of the Setubal Canyon
			504
			503		708		5027		thrust on the N bank of the Setubal Canyon
			502		412		2579		thrust on the N bank of the Setubal Canyon
Fault number:		14	THRUST			Measurement from southern tip
					Max Apparent Uplift (ms)		Horizontal Advection (m)
Perpendicular Line Number:			513		527		2491		base of slope thrust
			510		600		2757		base of slope thrust
			505		404		2979		base of slope thrust
			320		1252		6402		base of slope thrust
			406		621		3612		base of slope thrust
Fault number:		15	THRUST			Measurement from southern tip
					Max Apparent Uplift (ms)		Horizontal Advection (m)
Perpendicular Line Number:			520		245		1780		base of slope thrust
			519
			518		535		6671		base of slope thrust
			517
			516
			515		404		3871		base of slope thrust
			514
			513		279		2403		base of slope thrust
			512
			511
			510		643		4447		base of slope thrust
Fault number:		19	THRUST			Measurement from southern tip
					Max Apparent Uplift (ms)		Horizontal Advection (m)
Perpendicular Line Number:			532		158		2002		base of slope thrust
			531
			530		224		4489		base of slope thrust
			529
			528
			527		550		3379		base of slope thrust
			526
			525		534		4445		base of slope thrust
			524
			523		722		3245		Intersects Pereira de Souza Fault (Fault 11)
Fault number:		20	THRUST			Measurement from southern tip
					Max Apparent Uplift (ms)		Horizontal Advection (m)
Perpendicular Line Number:			551		730		8686		Gorringe E Flank
			550		1040		4682		Gorringe E Flank
			545		279		5138		Gorringe E Flank
			540		508		7921		Structural High NE of Gorringe Bank
			535		1039		4721		Structural High NE of Gorringe Bank
